# Supplementary material for: Efficient genome editing in Caenorhabditis elegans by CRISPR-targeted homologous recombination
Source: PubMed Central journal article supplement (PMC3814388; doi:10.1093/nar/gkt805), 2013-09-05
Supplement: supp_gkt805_nar-01937-met-h-2013-File005.pdf [file supp_gkt805_nar-01937-met-h-2013-File005.pdf]

## Codon-optimized Cas9 sequence

ATG **GACTACAAAAGATCACGATGGCGACTACAAAAGATACGATATCGACTACAAAAGACGATGACGATAAA** **CCAAA**  
**GAAGAAGCGTAAGGTA** GACAAGAAGTACTCCATCGGACTCGACATCGGAACCAACTCCGTCGGATGGGCCGTCAT  
CACCGACGACTACAAGGTCCCATCCAAGAAGTTC AAGGTCTCGGAAACACCGACCGTCACTCCATCAAGAAGAA  
CCTCATCGGAGCCCTCTTCCGGATCCGGAGAGACCCGCGAGGCCACCCGTCTCAAGCGTACCGCCGTCGTCTCGT  
TACACCCGTCGTAAGAACCCTATCTGCTACCTCCAAGAGATCTTCTCCAACGAGATGGCCAAAGCAACTCTTCGAG  
TCTTCCACCGTCTCGAGGAGTCTTCTCGTCGAGGAGGACAAGAAGCACGAGCGTCAACCAATCTTCGGAAACA  
TCGTCGACGAGGTCGCCTACCACGAGAAGTACCCAACCATCTACCACCTCCGTAAGAAGTTCGCCGACTCCACCG  
ACAAGGCCGACTCCGTCATCTACCTCGCCCTCGCCACATGATCAAGTTCGGTGGACACTTCTCATCGAGGG  
AGACCTCAACCCAGACAACCTCCGACGTCGACAAGTCTTCATCCAACCTCGTCCAAATCTCAAGCAACTCTTCGAG  
GAGAACCCAATCAACGCCTCCCGTGTGACGCCAAGGCCATCTCTCCGCCGTCCTCCAAGTCCCGTCTGTCG  
AGAACCTCATCGCCAACTCCAGGAGAGAAGCGTAAACGGACTCTTCGGAAACCTCATCGCCTCTCCCTCGGACT  
CACCCAAACTTCAAGTCCAACCTTCGACCTCGCCGAGACGCCAAGTCCAACCTCTCCAAGGACACCTACGACGA  
CGACCTCGACAACCTCGCCAAATCGGAGCAATACGCCGACTCTTCTCGCCGCAAGCAACTCTTCGAG  
GCCATCTCTCTCCGACATCTCCGTGTAACCTCGAGATCACCAAGGCCCACTCTCCGCTCCATGATCAAGC  
GTTACGACGAGCACCACCAAGACCTCACCTCTCAAGGCCCTCGTCCGTAACAACTCCAGAGAAGTACAAG **gt**  
**aagtttaaacatataataactaactaacctgattatttaaatctcag** GAGATCTTCTTCGACCAATCCAAGAACGGATACGCCGGATACATCGAC  
GGAGGACCTCCCAAGGAGGTTCTACAAGTTCATCAAGCAATCTTCGAGAAGATGGACGGAACCGAGGAGAT  
CTCTGTAAGTCAACCGTGAAGGACTCTCCGTAAGCAACGTACCTTCGACAACGGATCCATCCACACCAAAATC  
CACCTCGAGAGCTCCACGCCATCTCCGTGTCGTAAGGACTTCTACCCATCTCTCAAGGACAACCGTGAAGA  
ATCGAGAAGATCTCACCTTCCGATCCATACTACGTCGGACCACTCGCCGTCGGAACCTCCGTTTCGCCTGGA  
TGACCCGTAAGTCCGAGGAGACCATCACCCATGGAACCTTCGAGGAGGTCGTCGACAAGGAGCCTCCGCCAAT  
CCTTCATCGACGCTATGACCAACTTCGACAAGAACTCCCAAAACGAGAAGGTCCTCCCAAGCAACTCTCTCTA  
CGAGTACTTACCGTCTACAACGAGCTCACCAAGGTCAGTACGTCACCGAGGGAATGCGTAAGCCAGCCTTCT  
CTCCGGAGAGCAAAAAGAGGCCATCGTCGACCTCTTCAAGACCAACCGTAAGGTCACCGTCAAGCAACTCAA  
GGAGGACTACTTCAAGAAGATCGAGTGCTTCGACTCCGTCGAGATCTCCGGAGTCGAGGACCGTTTCAACGCCCT  
CCTCGGAGACTCCCTCAAGATCATCAAGGACAAGGACTTCTCGACAACGAGGACTTCTCGACAACGAGGACAT  
CCTCGAGGACATCGTCTCACCTCACCTCTTCGAGGACCGTGGAAATGATCGAGGAGCGTCTCAAGACCTACGCC  
CACCTTTCGACGACAAGGTCATGAAGCAACTCAAGCGTCTGTCGTTACACCGGATGGGGACGTCCTCCCGTAAG  
CTCATTAACGGAAATCCGTGACAAGCAATCCGGAAG **gtaagtttaaacagttcggtaactaaccatacatatttaaatctcag** ACCATCTCG  
ACTTCTCAAGTCCGAGATTCGCCAACCGTAACCTCATGCAACTCATCCACGACGACTCCCTCACCTCAAGGA  
GGACATCCAAAAGGCCAAGTCTCCGGACAAGGACTCCCTCCACGAGCAAAATCGCCAACCTCGCCGGATCCCC  
AGCCATCAAGAAGGGAATCTCCAAACCGTCAAGATCGTCGACGAGCTCGTCAAGGTCATGGGACACAAGCCAG  
AGAACATCGTCATCGAGATGGCCCGTGAGAACCAACCCCAAAAGGGACAAAAGAAGTCCCGTGAGCGTATG  
AAGCGTATCGAGGAGGGAATCAAGGAGTTCGGATCCCAACTCTCAAGGAGCACCAGTCGAGAACCCAACT  
CCAAAACGAGAAGCTCTACCTTACTACCTCCAAAACGACGTCGATGTACGTCGACCAAGAGCTCGACATCAA  
CCGTCTCTCCGACTACGACGTCGACCACATCGTCCCACAATCTTCATCAAGGACGACTCCATCGACAACAAGGTC  
CTCACCCGTTCCGACAAGAACCGTGGAAAGTCCGACAACGTCCCATCCGAGGAGGTCGTAAGAAGATGAAGAAC  
TACTGGCGTCAACTCTCAACGCCAAGTCTACCCAACGTAAGTTCGACAACCTCACCAAGGCCGAGCGTGGA  
GGACTCTCCGACTCGACAAGGCCGGATTCTCAAGGTCACCAAGGTCGACTCGTCGAGACCCGTCAAATCACCAAGCAGTC  
GCCAAATCTCGACTCCCGTATGAACACCAAGTACGACGAGAACGACAAGCTCATCCGTGAGGTCAAGGTCATC  
ACCCTCAAGTCCAAGCTCGTCTCCGACTTCCGTAAGGACTTCCAATTCTACAAGGTCGTCGATCAACAACCTACC  
ACCACGCCACGACGCCTACTCAACGCCGTCGTCGGAACCGCCCTCATCAAGAAGTACCCAAAGCTCGAGTCCG  
AGTTCGTCACGGAGACTACAAGGTCACGACGTCGTAAGATGATCGCCAAGTCCGAGCAAGAGATCGGAAAAG **gt**  
**aagtttaaacatgattttactaactaactaatctgatttaaatctcag** GCCACCGCAAGTACTTCTTCTACTCCAACATCATGAACTTCTTCAAGA  
CCGAGATCACCTCGCCAACGGAGAGATCCGTAAGCGTCCACTCATCGAGACCAACGGAGAGACCGGAGAGATC  
GTCTGGGACAAGGGACGTCGTCGACCCGTCGTAAGGTCCTTCCATGCCACAAGTCAACATCGTCAAGAAG  
ACCGAGTCCAAACCGGAGGATTCTCCAAGGAGTCCATCTCCAAAGCGTAACTCCGACAAGCTCATCGCCGT  
AAGAAGGACTGGGACCCAAAAGAAGTACGGAGGATTCGACTCCCCAACCGTCGCCTACTCCGTCTCTGTCGTCGCC  
AAGGTCGAGAAGGGAAGTCCAAGAAGCTCAAGTCCGTAAGGACTCCTCGGAATCACCATCATGGAGCGTTCC  
TCCTTCGAGAAGAACCATCGACTTCTCGAGGCCAAGGGATACAAGGAGGTCAAGAAGGACCTCATCAAG  
CTCCCAAAGTACTCTTCGAGCTCGAGAACGGAGCTAAGCGTATGCTCGCTCCGCCGAGAGCTCCAAAAG  
GGAAACGAGCTCGCCCTCCCATCCAAGTACGTCAACTTCTCTACTCGCTCCCACTACGAGAAGCTCAAGGGAT  
CCCCAGAGGACAACGAGCAAAAGCAACTTTCGTCGAGCAACACAAGCACTACCTCGACGAGATCATCGAGCAA  
ATCTCCGAGTTCCTCAAGCGTGTATCTCGCCGACGCCAACCTCGACAAGGTCCTCTCCGCCTACAACAAGCACC  
GTGACAAGCCAATCCGTGAGCAAGCCGAGAACATCACCTTTCACCCTCACCAACCTCGGAGCCCCAGCCG  
CCTCAAGTACTTCGACACCACCATCGACCGTAAGCGTTACACCTCCACCAAGGAGGTCCTCGACGCCACCCTCAT  
CCCCAATCCATCACCGGACTCTACGAGACCCGATCGACCTTCCCAACTCGGAGGAGAC **ATGAGCCGTAGACG**  
**AAAAGCGAATCCGACAAAACCTGAGTGAACCGCAAGAAGCTTGCCAAGGAAGTTGAAAAT** TAA

 : 3X FLAG

 : SV40

 : Artificial intron

 : *egl-13*

## Chimeric RNA sequence with *rpr-1* promoter

```
cgattcggctaaaaatagcgaaaaacatcaaattgtattaaaaagaagcagttgaaatgagtgaggctcagagact  
acaaactacaaaaaggctcagcctcaaccaatgtagtgtaaaaattgatttttcagttaaaaacgatggtttgatgctttt  
acctatttacagatagaaaatttaaattcgcaaaaatcttaaaaataaacTTTTGTTGGTTTCGCTCGAAAATAGCTTAA  
ttgcagttttctcaaaaactctaaattcatgcgtccacgtggctttctatcaattaaataactaataataattttctcaaaa  
ctgccacgttacagcctgcatagcctctgaaactctacaattcccctctaactactagcgcgcctccccgcactcaa  
cacagcgagcggcggaacccgcggggtgctggccgctcggacacgctcccgtatataacgacgcggcgcgctcaag  
ttgtGNNNNNNNNNNNNNNNNNNNNNNNNNNNNNNNNNNNNNNNNNNNNNNNNNNNNNNNNNNNNNNNNNNNNNNNN  
AATAAGGCTAGTCCGTTATCAACTTGAAAAAGTGGCACCGAGTCGGTGCTT  
ttgtgggcttcagctttctgtgggcccgttttaggccaaatgatagaaagccacgtggaaatcatgaattaaagctatttcg  
agcgaatcagaaaaaaagttatttttaagattttgctgaatttacatttctaaatgtaaaataggtgaaagcatcaaa  
aacatagttttaactgaaaaaatcaattttaacactaaaaattggttgaggctgatcctttttagttttagtctctgagcc  
tactcaaaattcaaaagtcttttgatacaaattgatgattttcgtattttctagccgaaatcgtattttcaacatttcttaa  
caaaataggattgctcaaaatgataaacattatttaaaagtaccgttaaagttgtaccaaaaatagtgaaattattttttt
```

-  : *rpr-1* promoter
-  : target RNA sequence, which is replaced by EcoRI
-  : guide RNA scaffold sequence
-  : *rpr-1* terminator
